# Supplementary material
Source: Springer Nature journal article supplement (https://www.springermedizin.de/resource/supplementary/13256_2007_321_MOESM1_ESM.pdf/9645722)

m 60  
25 11 4  
20 15  
13:2

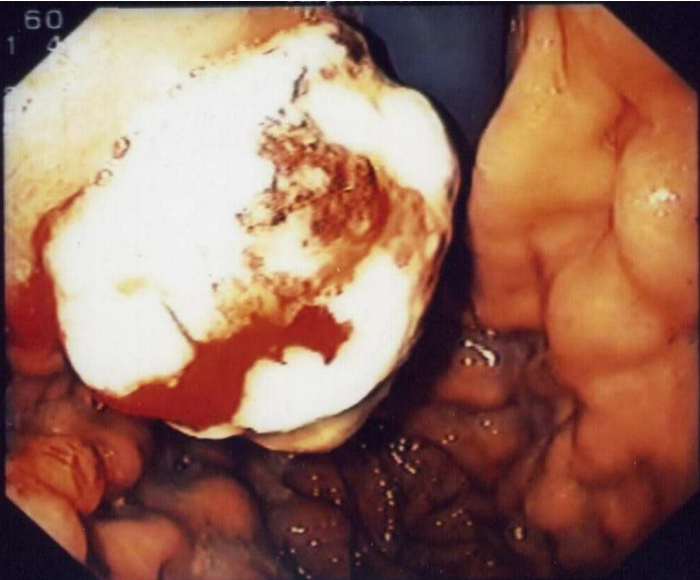

neoformazione fondo

Supplement: MOESM1 [file 9645722]
